# Supplementary material for: Polypharmacy Among Headache Patients: A Cross-Sectional Study
Source: PubMed Central journal article supplement — CNS Drugs. 2018 May 11;32(6):567–78. doi: 10.1007/s40263-018-0522-8 (PMC6061427; doi:10.1007/s40263-018-0522-8), 2018-05-11
Supplement: 40263_2018_522_MOESM1_ESM.pdf [file 40263_2018_522_MOESM1_ESM.pdf]

## Electronic Supplementary Material

### Polypharmacy among headache patients: a cross-sectional study

Anna Ferrari<sup>1\*</sup>, Carlo Baraldi<sup>2</sup>, Manuela Licata<sup>3</sup>, Cecilia Rustichelli<sup>4</sup>

<sup>1</sup> Unit of Medical Toxicology, Headache and Drug Abuse Centre; Department of Diagnostic, Clinical and Public Health Medicine, University of Modena and Reggio Emilia, Via del Pozzo, 71, 41124 Modena, Italy

<sup>2</sup> School of Medical Toxicology, University of Modena and Reggio Emilia, Via del Pozzo, 71, 41124 Modena, Italy.

<sup>3</sup> Forensic Toxicology Laboratory, Department of Diagnostic Medicine, Department of Diagnostic, Clinical and Public Health Medicine, University of Modena and Reggio Emilia, Via del Pozzo, 71, Modena, Italy

<sup>4</sup> Department of Life Sciences, University of Modena and Reggio Emilia, via G. Campi, 103, 41125 Modena, Italy

<sup>1\*</sup> Author for correspondence: Anna Ferrari: email: [anna.ferrari@unimore.it](mailto:anna.ferrari@unimore.it); tel. +39-059-4224064; fax +39-059-4224069, **ORCID**: 0000-0001-9536-3995

<sup>2</sup> Carlo Baraldi: e mail: [infocarlobaraldi@gmail.com](mailto:infocarlobaraldi@gmail.com); tel. +39-059-4224064; **ORCID**: 0000-0001-8432-1888

<sup>3</sup> Manuela Licata: email: [manuela.licata@unimore.it](mailto:manuela.licata@unimore.it); tel. +39-059-4224870; **ORCID**: 0000-0002-4309-9309

<sup>4</sup> Cecilia Rustichelli: email: [cecilia.rustichelli@unimore.it](mailto:cecilia.rustichelli@unimore.it); tel. +39-059-2058576, **ORCID**: 0000-0001-8917-9980

ESM\_1 Frequency of different age classes within each patient group

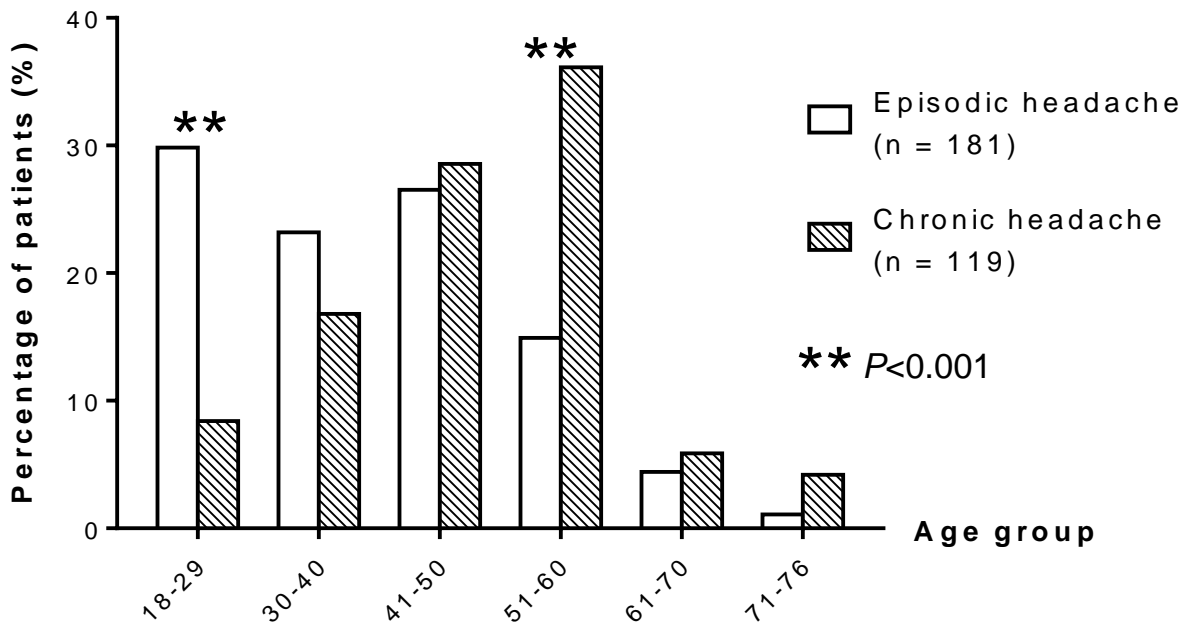

ESM\_2 Receiver-Operator Characteristic (ROC) curve for multivariate logistic analysis

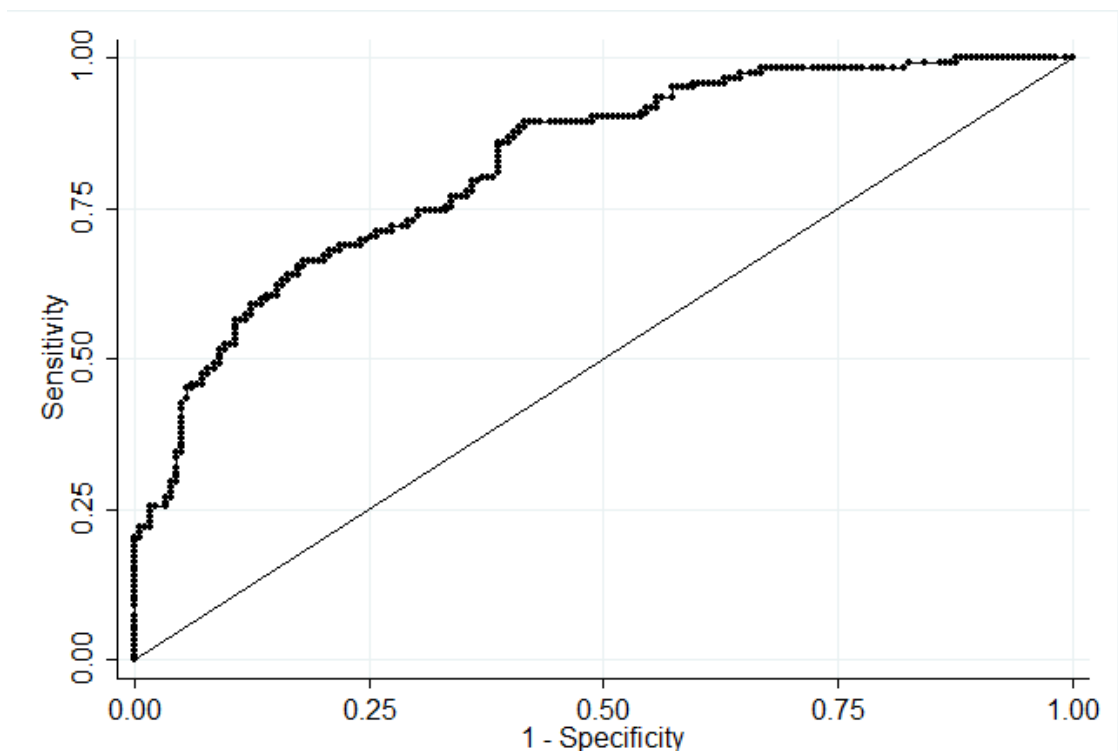

ROC receiver-operator characteristic

Area under ROC curve = 0.8223
